# Supplementary material
Source: ML conference proceedings conference paper supplement (https://openaccess.thecvf.com/content/CVPR2022/html/Zietlow_Leveling_Down_in_CVPR_2022_paper.html)
Supplement: Supplementary file 1 [file Zietlow_Leveling_Down_in_CVPR_2022_supplemental.pdf]

## Supplementary Materials

### A. Additional Experimental Results

An extensive overview for the results visualized in Figure 4 are listed in Table S1.

### B. GAN based SMOTE

#### Algorithm S2 GAN based synthetic minority oversampling

- 1: **Inputs:**  
Hyper-parameters  $m, k \in \mathbb{N}^+$   
Train dataset  $D_{\text{Train}} = \{(x_0, y_0), (x_1, y_1), \dots\}, x_i \in \mathcal{X}, y_i \in \mathcal{Y}$   
Trained invertible GAN  $E: \mathcal{X} \rightarrow \mathcal{Z}, G: \mathcal{Z} \rightarrow \mathcal{X}, \mathcal{Z} = \mathbb{R}^n$   
datapoint  $(x_s, y_s)$
- 2: **Encode dataset**  
 $D_{\text{Train}} \leftarrow \{(x_0, y_0, z_0), (x_1, y_1, z_1), \dots\}, z_i = E(x_i)$
- 3: **Determine  $m$  nearest neighbours**  
 $N \leftarrow \{z_0^N, z_1^N, \dots, z_m^N\}$   
according to  $z_i^N = \arg \min_{z_j \in \{z_0^N, \dots, z_{i-1}^N\}} \|z_s - z_j\|^2 \text{ s.t. } y_s = y_j$
- 4: **Randomly choose  $k$  neighbours from that set**  
 $N \leftarrow \{x_{\pi(0)}^N, x_{\pi(1)}^N, \dots, x_{\pi(k)}^N\}$
- 5: **Uniformly sample**  $z_{\text{Augment}} \sim \mathcal{U}[\text{Simplex}[N]]$
- 6: **Return**  $(G(z_{\text{Augment}}), y_s)$

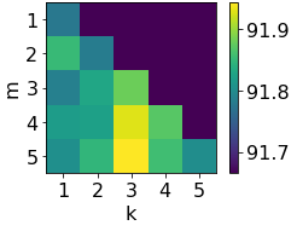

Figure S1. The effect of varying the number of additional neighbors used in the simplex ( $k$ ) against the number of close neighbors sampled from. We see strongest results where  $k = 3$  (note that  $k$  is the number of neighbors, so in this case it corresponds to a 4-simplex), and where we sample from a greater range of neighbors.  $k = 1$  corresponds to standard SMOTE.

### C. Efficient Uniform sampling from the Convex Hull of Points

Here, we briefly summarize the strategy for efficiently uniformly sampling from the convex hull of a set of  $k$  points in an  $n$ -dimensional space where  $k \leq n + 1$ , as we have only been able to find related approaches in the literature for  $k = 3$  [60].

Under minimal assumptions, e.g., the points are sampled with continuous noise, with probability 1 the  $k$  points form a  $k - 1$  dimensional simplex, or generalized triangle. This allows us to sample efficiently using an inductive process. Given a point  $\rho_i$  sampled from a  $i$  dimensional simplex,  $S_i$  we can uniformly sample from an  $i+1$  dimensional simplex,

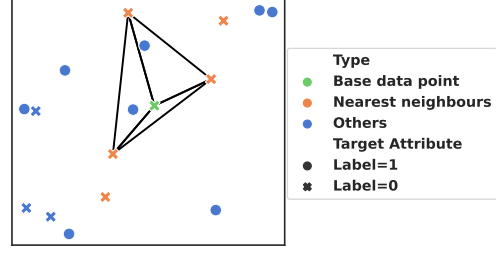

Figure S2. Visualization of the uniform simplex sampling strategy for improved data diversity. Given a datapoint (green) and its nearest  $m$  neighbours with the same target label (orange) we randomly choose  $k$  neighbours to form a simplex. datapoints with other labels (blue crosses) or too large distance (blue dots) are ignored.

$S_{i+1} = S_i \cup \{p_i\}$  by choosing

$$\rho_{i+1} = \lambda^{1/i} \rho_i + (1 - \lambda^{1/i}) p_{i+1} \quad (\text{S1})$$

where  $\lambda$  is sampled from the uniform distribution  $U[0, 1]$ .

The base case is  $S_1 = \{p_1\}$ , and  $\rho_1 = p_1$ .

Note that when the assumption fails, and points are co-linear and do not form a simplex, the algorithm degrades reasonably. Sampled points will lie inside the convex hull of points, but the samples will not be uniform.

### D. Architecture, Dataset and Details

The classifiers are built upon pretrained ResNet50 models [39]. For each of the binary attributes of the CelebA dataset, one classifier is trained. As the protected attribute we chose “male”<sup>7</sup>. Each model was trained for  $3 \cdot 10^6$  images and evaluated every 500 batches using Adam ( $lr = 10^{-4}$ ) and a batch size of 64. Images were center-cropped and down-scaled to  $128 \times 128$ . We use RandAugment with  $N = 3, M = 15$  for every experiment unless otherwise stated. The reported numbers are the retrieved peak performance during the training period, evaluated on the hold-out evaluation dataset. We rely on the analysis of [66] and report the means over the attributes with *gender independent label quality*: “bags under eyes”, “bangs”, “black hair”, “blond hair”, “brown hair”, “chubby”, “eyeglasses”, “gray hair”, “high cheekbones”, “mouth slightly open”, “narrow eyes”, “smiling”, “wearing hat”. Rows labelled with \* show results achieved using the codebase of [82]. For the invertible GAN model, we choose InvGAN [32], however the requirements on the model are

<sup>7</sup>The labels in CelebA refer to an externally assigned perceived binary gender, and not to self-assigned gender identity. Although the binary nature of the label does not reflect the true distribution of either, we are restricted to the annotations available in the dataset.

| Method         | Baseline<br>multi task<br>[82] | Weighting<br>[82] | Domain Disc.<br>[70, 82] | Domain Indep.<br>[82] | Uniconf. Adv.<br>[4] | Baseline<br>single task<br>[66] | GAN Debiasing<br>[66] | Regularized<br>[61,83] | g-SMOTE +<br>Adaptive Sampling<br>[ours] | g-SMOTE<br>[ours] | Baseline<br>FairMixup<br>[20] | FairMixup<br>[20] |
|----------------|--------------------------------|-------------------|--------------------------|-----------------------|----------------------|---------------------------------|-----------------------|------------------------|------------------------------------------|-------------------|-------------------------------|-------------------|
| Accuracy       | <b>91.79</b>                   | 91.45             | 91.78                    | 91.24                 | 90.86                | 92.47                           | 92.12                 | 91.05                  | 92.56                                    | <b>92.64</b>      | <b>92.74</b>                  | 88.46             |
| Max. grp. acc. | 93.66                          | 93.35             | <b>93.69</b>             | 93.04                 | 93.15                | 94.46                           | 94.03                 | 94.42                  | 94.44                                    | <b>94.59</b>      | <b>93.85</b>                  | 90.42             |
| Min. grp. acc. | <b>89.52</b>                   | 89.06             | 89.39                    | 88.93                 | 88.08                | 90.14                           | 89.85                 | 87.86                  | <b>90.36</b>                             | 90.35             | <b>91.44</b>                  | 86.36             |
| TPR            | 64.51                          | 64.02             | 62.80                    | <b>70.74</b>          | 50.15                | <b>67.90</b>                    | 66.13                 | 54.20                  | 67.11                                    | 66.14             | <b>79.13</b>                  | 46.67             |
| Max. grp. TPR  | 72.29                          | 67.41             | 70.13                    | <b>75.61</b>          | 59.59                | 73.88                           | 70.36                 | 56.11                  | <b>74.06</b>                             | 73.43             | <b>80.89</b>                  | 47.85             |
| Min. grp. TPR  | 57.09                          | 59.74             | 55.06                    | <b>66.05</b>          | 40.72                | <b>61.34</b>                    | 61.25                 | 52.34                  | 59.78                                    | 58.32             | <b>72.92</b>                  | 44.27             |
| DEO            | 15.20                          | <b>7.67</b>       | 15.08                    | 9.56                  | 18.87                | 12.54                           | 9.11                  | <b>3.77</b>            | 14.28                                    | 15.11             | 7.97                          | <b>3.58</b>       |
| DEODD          | 18.14                          | <b>9.00</b>       | 18.10                    | 13.29                 | 21.48                | 16.54                           | 12.04                 | <b>5.06</b>            | 19.30                                    | 19.32             | 10.06                         | <b>4.29</b>       |

Table S1. Fairness methods on the CelebA dataset. We report mean scores over the 13 labels [66] call *gender independent*. We report the model with the greatest min. group accuracy over the training period.

| Attribute Name      | Baseline     | AdaptiveSMOTE |
|---------------------|--------------|---------------|
| Wavy Hair           | 76.95 ± 0.32 | 77.86 ± 0.11  |
| Big Lips            | 80.49 ± 0.15 | 80.30 ± 0.16  |
| Eyeglasses          | 99.23 ± 0.01 | 99.25 ± 0.02  |
| Attractive          | 78.80 ± 0.14 | 79.17 ± 0.10  |
| Brown Hair          | 81.26 ± 0.05 | 81.18 ± 0.12  |
| Wearing Necklace    | 80.30 ± 0.01 | 80.30 ± 0.01  |
| High Cheekbones     | 85.53 ± 0.11 | 85.61 ± 0.22  |
| Receding Hairline   | 91.08 ± 0.09 | 91.49 ± 0.11  |
| Wearing Hat         | 98.21 ± 0.02 | 98.22 ± 0.08  |
| Black Hair          | 86.40 ± 0.10 | 87.19 ± 0.26  |
| Gray Hair           | 95.28 ± 0.09 | 95.39 ± 0.08  |
| Pale Skin           | 95.26 ± 0.06 | 95.43 ± 0.07  |
| Smiling             | 91.64 ± 0.17 | 91.91 ± 0.09  |
| Chubby              | 89.29 ± 0.02 | 89.35 ± 0.12  |
| Young               | 82.28 ± 0.10 | 82.99 ± 0.24  |
| Wearing Earrings    | 83.46 ± 0.14 | 83.67 ± 0.23  |
| Big Nose            | 70.71 ± 0.29 | 71.12 ± 0.32  |
| Oval Face           | 70.67 ± 0.10 | 71.15 ± 0.03  |
| Bags Under Eyes     | 73.24 ± 0.37 | 73.69 ± 0.19  |
| Bushy Eyebrows      | 87.08 ± 0.09 | 87.36 ± 0.08  |
| Mouth Slightly Open | 93.46 ± 0.12 | 93.58 ± 0.06  |
| Rosy Cheeks         | 90.87 ± 0.11 | 90.97 ± 0.09  |
| Arched Eyebrows     | 76.67 ± 0.35 | 76.83 ± 0.26  |
| Blurry              | 95.58 ± 0.05 | 95.61 ± 0.06  |
| Wearing Lipstick    | 86.14 ± 0.17 | 86.44 ± 0.14  |
| Blond Hair          | 91.96 ± 0.05 | 92.10 ± 0.13  |
| Heavy Makeup        | 84.13 ± 0.36 | 84.13 ± 0.01  |
| Pointy Nose         | 69.20 ± 0.16 | 69.86 ± 0.11  |
| Straight Hair       | 77.72 ± 0.42 | 77.98 ± 0.12  |
| Bangs               | 94.67 ± 0.17 | 94.72 ± 0.04  |
| Double Chin         | 91.43 ± 0.04 | 91.57 ± 0.17  |
| Narrow Eyes         | 91.97 ± 0.08 | 92.32 ± 0.21  |

Table S2. Min. group accuracy for individual attributes of CelebA. Reported are the means and standard deviations over 3 restarts of all attributes with at least 11 positive and negative datapoints per group. The protected attribute is “*male*”. We evaluate the model with greatest min. group accuracy over the training period. Both methods were trained on 10000 images from the CelebA training set.

low: Aside from state-of-the-art image quality, we need decent interpolation capabilities as well as a reasonable semantic structure of the latent space.

**Regularized Approach.** The regularized model presented in Figure 4 is based on a regularizer used in [83]. Given training data  $\mathcal{D} = \{x_i, y_i, a_i\}_{i=1}^n$  and a model  $f$  (as above) that outputs classification scores in  $[0, 1]$ , we define the regularizer  $\mathcal{R}^{\text{DEO}}$  as

$$\mathcal{R}^{\text{DEO}}(f) := \left( \frac{1}{n_{11}} \sum_{\mathcal{D}_{11}} f(x_i) - \frac{1}{n_{10}} \sum_{\mathcal{D}_{10}} f(x_i) \right)^2,$$

where  $\mathcal{D}_{ya} = \{(\tilde{x}, \tilde{y}, \tilde{a}) : \tilde{a} = a, \tilde{y} = y, (\tilde{x}, \tilde{y}, \tilde{a}) \in \mathcal{D}\}$  and  $n_{ya} = |\mathcal{D}_{ya}|$  for  $g \in \{0, 1\}$ .

We simply add the fairness regularizer to the loss and trade-off fairness with the accuracy of the classifier via a hyperparameter  $\lambda$ . We minimize  $\hat{\mathcal{L}}(f) = \sum_{i=1}^n l(f(x_i), y_i) + \lambda \mathcal{R}^{\text{DEO}}(f)$ .
